# Supplementary material for: Matrine induces RIP3-dependent necroptosis in cholangiocarcinoma cells
Source: PubMed Central journal article supplement (PMC5253620; doi:10.1038/cddiscovery.2016.96), 2017-01-23

# Figure S1

**a**

HT-29

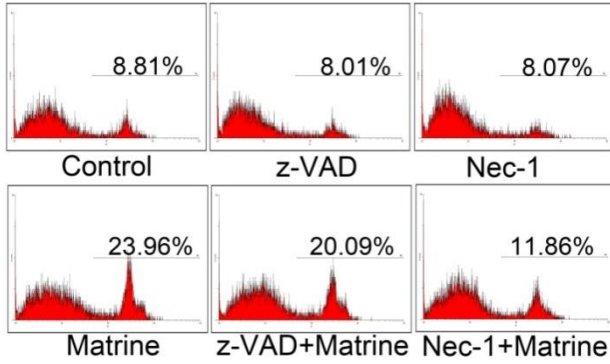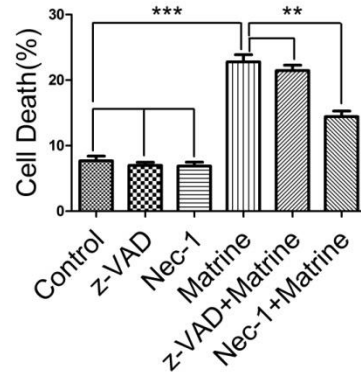

**b**

HeLa

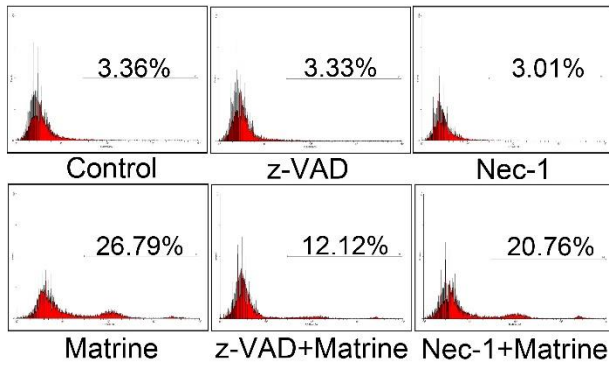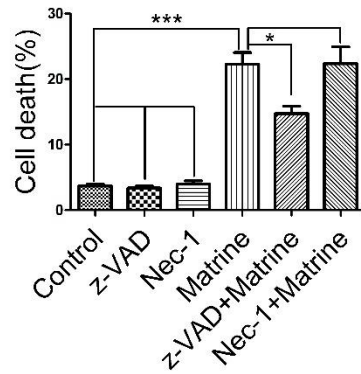

**c**

MCF-7

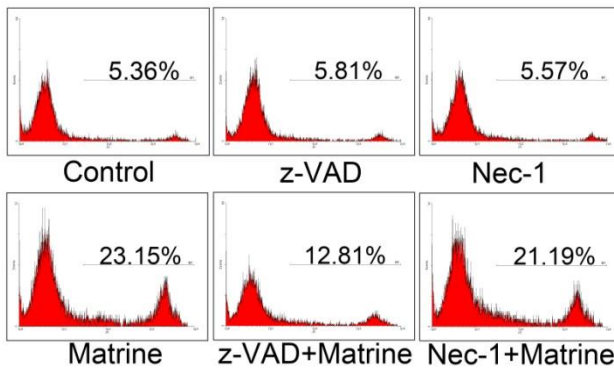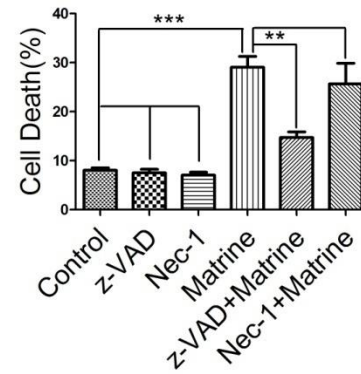

Figure S2

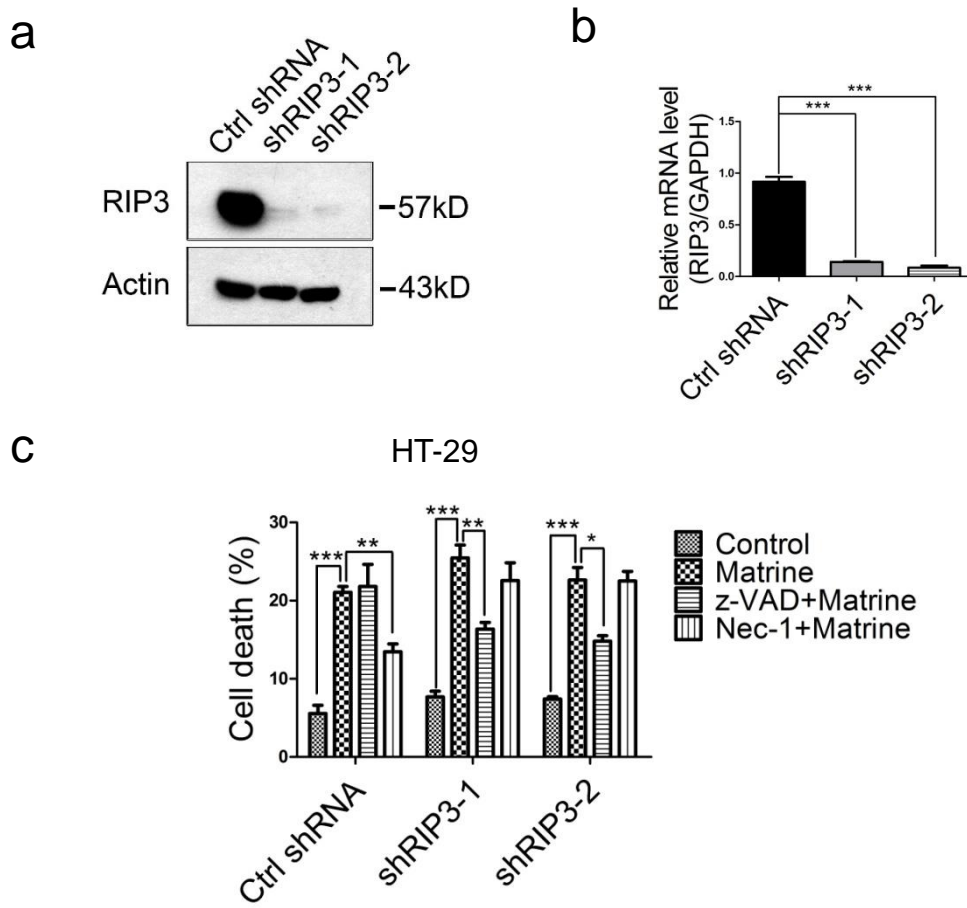

Supplement: cddiscovery201696-s1.pdf [file cddiscovery201696-s1.pdf]
